# Supplementary material
Source: publisher figshare collection journal article supplement (https://karger.figshare.com/ndownloader/files/16436558)
Supplement: Supplementary file 1 [file 16436558]

**Nephrotoxic medication**

***Antibiotics/ antiviral drugs/ antimycotics***

- vancomycin - daptomycin
- clavulanate - gentamycin
- tazobactam - tobramycin
- cotrimoxazole - amikacin
- (val)acyclovir - clarithromycin
- amphotericin B - fluconazole
- levofloxacin
- micafungin

***Diuretics***

- furosemide
- bumetanide
- amiloride

***Non-steroidal anti-inflammatory drugs***

- aceclofenac - diclofenac
- acetylsalicylic acid - naproxen
- phenylbutazone - ibuprofen
- meloxicam - celecoxib
- dexketoprofen - etoricoxib
- nabumetone - indomethacin
- parecoxib - tiaprofenic acid

***ACE-inhibitors/ ATII-antagonists/ renin-antagonists***

- captopril - fosinopril
- enalapril - lisinopril
- perindopril - quinapril
- ramipril - aliskiren
- candesartan - losartan

***Immune-suppressive drugs***

- tacrolimus
- ciclosporin

***Other***

- colchicine - deferoxamine
- lamivudine - methotrexate
- zidovudine - ifosfamide
- abacavir - gabapentin
- carbamazepine - carboplatin
- cisplatin
